# Supplementary material for: Highly robust SiCOH/mesoporous SiO2 ultralow dielectric films with heterostructures
Source: Royal Society of Chemistry journal article supplement (doi:10.1039/c4ra03604b), 2014-01-01
Supplement: c4ra03604b1.pdf [file c4ra03604b1.pdf]

Supplementary Information for :

## Highly robust SiCOH/mesoporous SiO<sub>2</sub> ultralow dielectric films with heterostructures

5

**Jong-Min Park<sup>a,d</sup>, Kyoung Hwan Kim<sup>a</sup>, Cheng Jin An<sup>a</sup>, Ming Liang Jin<sup>a</sup>, Jun-Hee Hahn <sup>c</sup>,  
Byung-Seon Kong<sup>\*b</sup> and Hee-Tae Jung<sup>\*a</sup>**

10

*<sup>a</sup> National Research Lab. For Organic Opto-Electronic Materials, Department of Chemical and Biomolecular Eng. (BK-21), Korea Advanced Institute of Science and Technology, Daejeon 305-701, Korea. Fax: +82 42 350 3910; Tel: +82 42 350 3931; E-mail: heetae@kaist.ac.kr*

15 *<sup>b</sup> KCC Central Research Institute, 83 Mabook-dong, Giheung-gu, Yonginsi, Gyunggi-do 446-912, Korea E-mail: kongku@kccworld.co.kr*

*<sup>c</sup> Division of Advanced Technology, Korea Research Institute of Standards and Science, Daejeon 305-340, Korea*

20

*<sup>d</sup> Performance Materials R&D Center, SK innovation, 325, Exporo, Yuseong-gu, Daejeon, 305-712, Korea*

25

30

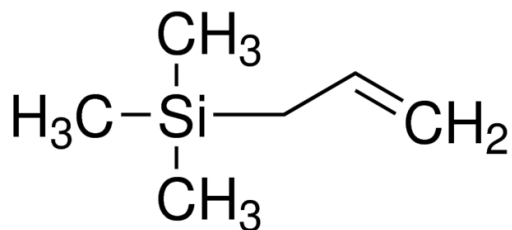

**ATMS (top matrix)**

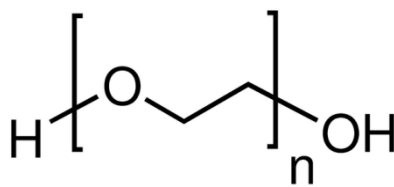

**PEG (porogen)**

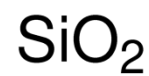

**SBA-15 (bottom matrix)**

10

**Fig. S1.** Molecular structure of ATMS, PEG, and SBA-15 used as the matrix and labile phase source, respectively.

15

20

**Table S1.** Properties of mesoporous SiO<sub>2</sub> powders.

5

| Type                        | Size (nm) | Pore size (nm) | Surface area (m <sup>2</sup> /g) |
|-----------------------------|-----------|----------------|----------------------------------|
| <b>SBA-15</b>               | -         | <b>7.4</b>     | <b>802</b>                       |
| MCM41                       | 4.5 ~ 4.8 | 2.1~2.7        | 1000                             |
| Porous SiO <sub>2</sub>     | 5 ~ 15    | Spherical      | 590 ~ 690                        |
| SiO <sub>2</sub> nanopowder | 12        | -              | 175~225                          |

**Table S2.** Mechanical properties of mesoporous SiO<sub>2</sub>/PEG composite films.

| Materials                       | Modulus (GPa) | Hardness (GPa) |
|---------------------------------|---------------|----------------|
| <b>SBA-15/PEG</b>               | <b>2.93</b>   | <b>0.10</b>    |
| MCM41/PEG                       | 1.42          | 0.07           |
| Porous SiO <sub>2</sub> /PEG    | 1.85          | 0.04           |
| SiO <sub>2</sub> nanopowder/PEG | 4.04          | 0.05           |

10 SBA-15 has high modulus and hardness among mesoporous silicas with high surface area (~800 m<sup>2</sup>/g). We selected SBA-15/PEG as a buffer layer of SiCOH/mesoporous SiO<sub>2</sub> composite films for this reason.

**Table S3.** A comparison table between this study and previously reported dielectric constants and moduli of 10 low-k SiCOH films.<sup>33-37,48-51</sup>

| Dielectric constant | Modulus [GPa] | Ref.                                                                      |
|---------------------|---------------|---------------------------------------------------------------------------|
| 2.6                 | 6.4           | Jousseaume et al., <i>J. Electrochem. Soc.</i> , 2007.                    |
| 2.4                 | 3.5           | Burkey et al., <i>J. Electrochem. Soc.</i> , 2004.                        |
| 2.4                 | 9             | Frot et al., <i>Adv. Funct. Mater.</i> , 2012.                            |
| <b>2.4</b>          | <b>8.4</b>    | <b>Park et al., <i>J. Mater. Chem. C</i>, 2013.</b>                       |
| 2.3                 | 5.9           | Rathore et al., <i>Adv. Funct. Mater.</i> , 2008.                         |
| 2.3                 | 4.1           | Dubois et al., <i>Proc. IEEE Int. Interconnect Technol. Conf.</i> , 2005. |
| 2.2                 | 6~7           | Eslava et al., <i>J. Am. Chem. Soc.</i> , 2008.                           |
| 2.2                 | 5.4           | Trujillo et al., <i>Adv. Funct. Mater.</i> , 2010.                        |

2.0

4.3

*This work*
